# Supplementary material for: Reporting of harms data in RCTs: a systematic review of empirical assessments against the CONSORT harms extension
Source: HighWire-hosted journal article supplement (doi:10.1136/bmjopen-2013-003436), 2013-09-01
Supplement: bmjopen-2013-003436supp.pdf [file bmjopen-2013-003436supp.pdf]

Search strategy:

**Ovid MEDLINE:**

1. harm\*
2. Safe\*
3. CONSORT
4. Consolidation of standards reporting trials
5. (#3 OR #4)
6. (#1 OR #3 OR #4)
7. (#2 OR #5)
8. Toxic\*
9. Adverse events
10. Adverse effects
11. Adverse
12. (#9 OR #10 OR #11)
13. (#5 OR #12)
14. Randomised
15. Randomized
16. RCTs
17. Randomised controlled trials
18. Randomized controlled trials
19. (#14 OR #15 OR #16 OR #17 OR #18)
20. Clinical trials
21. Side effect
22. Risk\*
23. Complication\*
24. Treatment next emergent
25. Post marketing next surveillance
26. drug next surveillance
27. (#5 OR #12 OR #19)
28. (#1 OR #2 OR #3 OR #4 OR #5 OR #6 OR #7 OR #8 OR #9 OR #10 OR #11 OR #12 OR #13 OR #14 OR #15 OR #16 OR #17 OR #18 OR #19 OR #20 OR #21 OR #22 OR #23 OR #24 OR #25 OR #26)
29. consort or consolidat\$ standard\$
30. \*randomized controlled trials/
31. \*clinical trials/

\*truncates the word e.g. harm\* (harm, harms or harmful).

**ISI Web of Knowledge:**

1. harm\*
2. Safety
3. CONSORT
4. Consolidation of standards reporting trials
5. Adverse events
6. Adverse effects
7. (#1 OR #2 OR #3 OR #4 OR #5 OR #6)
8. ((consort OR 'consolidat\*') AND (checklist\* OR quality))

**Scopus:**

1. harm\*
2. Safety
3. CONSORT
4. Consolidation of standards reporting trials
5. Adverse events
6. Adverse effects
7. (#1 OR #2 OR #3 OR #4 OR #5 OR #6)

**Cochrane Library:**

1. CONSORT
2. Consolidation of standards reporting trials
3. harms
4. Safety
5. Adverse events
6. RCTs
7. Randomised controlled trials
8. (#1 OR #2 OR #3 OR #4 OR #5 OR #6 OR #7)
